# Supplementary material for: Seasonal variations of heavy metals contamination in sediment, water and crab at a vital fish sanctuary connected to the Bay of Bengal and health risk assessment
Source: Research Square preprint supplement (doi:10.21203/rs.3.rs-8396018/v1), 2026-01-12
Supplement: Supplementary file 1 [file 2f373abb332ca3ac088c2342.docx]

**Supplementary table 1 (A):** Spearman’s correlation matrix among heavy metals during summer in sediment

|  | As | Cd | Co | Cr | Cu | Fe | Mn | Ni | Pb | Se | Zn |
| --- | --- | --- | --- | --- | --- | --- | --- | --- | --- | --- | --- |
| As | 1.000 |  |  |  |  |  |  |  |  |  |  |
| Cd | -.055 | 1.000 |  |  |  |  |  |  |  |  |  |
| Co | .842** | -.067 | 1.000 |  |  |  |  |  |  |  |  |
| Cr | .818** | -.006 | .952** | 1.000 |  |  |  |  |  |  |  |
| Cu | .891** | -.236 | .915** | .842** | 1.000 |  |  |  |  |  |  |
| Fe | .855** | -.152 | .952** | .939** | .952** | 1.000 |  |  |  |  |  |
| Mn | .636* | -.127 | .867** | .842** | .721* | .770** | 1.000 |  |  |  |  |
| Ni | .867** | -.055 | .976** | .952** | .915** | .952** | .818** | 1.000 |  |  |  |
| Pb | .915** | -.224 | .879** | .782** | .976** | .915** | .685* | .891** | 1.000 |  |  |
| Se | .491 | -.273 | .673* | .758* | .661* | .758* | .745* | .624 | .564 | 1.000 |  |
| Zn | .661* | -.164 | .758* | .770** | .842** | .806** | .673* | .782** | .745* | .770** | 1.000 |
| **. Correlation is significant at the 0.01 level (2-tailed). | | | | | | | | | | | |
| *. Correlation is significant at the 0.05 level (2-tailed). | | | | | | | | | | | |

**Supplementary table 1 (B):** Spearman’s correlation matrix among heavy metals during winter in sediment

|  | As | Cd | Co | Cr | Cu | Fe | Mn | Ni | Pb | Se | Zn |
| --- | --- | --- | --- | --- | --- | --- | --- | --- | --- | --- | --- |
| As | 1.000 |  |  |  |  |  |  |  |  |  |  |
| Cd | -.394 | 1.000 |  |  |  |  |  |  |  |  |  |
| Co | .842** | -.164 | 1.000 |  |  |  |  |  |  |  |  |
| Cr | .661* | .212 | .479 | 1.000 |  |  |  |  |  |  |  |
| Cu | .879** | -.394 | .697* | .491 | 1.000 |  |  |  |  |  |  |
| Fe | .758* | -.030 | .552 | .952** | .612 | 1.000 |  |  |  |  |  |
| Mn | .612 | .333 | .552 | .806** | .370 | .709* | 1.000 |  |  |  |  |
| Ni | .479 | -.018 | .321 | .576 | .673* | .600 | .188 | 1.000 |  |  |  |
| Pb | .430 | .103 | .661* | .067 | .600 | .115 | .261 | .345 | 1.000 |  |  |
| Se | .309 | .539 | .539 | .358 | .212 | .236 | .745* | .079 | .661* | 1.000 |  |
| Zn | .794** | -.018 | .806** | .794** | .588 | .782** | .697* | .527 | .273 | .442 | 1.000 |
| **. Correlation is significant at the 0.01 level (2-tailed). | | | | | | | | | | | |
| *. Correlation is significant at the 0.05 level (2-tailed). | | | | | | | | | | | |

**Supplementary table 2 (A):** Spearman’s correlation matrix among heavy metals during summer in water

|  | As | Cd | Co | Cr | Cu | Fe | Mn | Ni | Pb | Se | Zn |
| --- | --- | --- | --- | --- | --- | --- | --- | --- | --- | --- | --- |
| As | 1.000 |  |  |  |  |  |  |  |  |  |  |
| Cd | .339 | 1.000 |  |  |  |  |  |  |  |  |  |
| Co | .418 | .111 | 1.000 |  |  |  |  |  |  |  |  |
| Cr | .527 | .191 | .236 | 1.000 |  |  |  |  |  |  |  |
| Cu | .806** | .271 | .382 | .673* | 1.000 |  |  |  |  |  |  |
| Fe | -.406 | -.437 | -.248 | -.261 | -.091 | 1.000 |  |  |  |  |  |
| Mn | .430 | .511 | .782** | .285 | .345 | -.503 | 1.000 |  |  |  |  |
| Ni | .418 | .326 | .818** | .539 | .564 | -.261 | .818** | 1.000 |  |  |  |
| Pb | .406 | -.086 | -.358 | .382 | .285 | -.261 | -.309 | -.152 | 1.000 |  |  |
| Se | -.304 | -.340 | -.219 | .426 | -.103 | .055 | -.049 | .109 | .085 | 1.000 |  |
| Zn | .685* | .523 | .624 | .030 | .467 | -.552 | .758* | .515 | -.164 | -.456 | 1.000 |
| *. Correlation is significant at the 0.05 level (2-tailed). | | | | | | | | | | | |
| **. Correlation is significant at the 0.01 level (2-tailed). | | | | | | | | | | | |

**Supplementary table 2 (B):** Spearman’s correlation matrix among heavy metals during winter in water

|  | As | Cd | Co | Cr | Cu | Fe | Mn | Ni | Pb | Se | Zn |
| --- | --- | --- | --- | --- | --- | --- | --- | --- | --- | --- | --- |
| As | 1.000 |  |  |  |  |  |  |  |  |  |  |
| Cd | .055 | 1.000 |  |  |  |  |  |  |  |  |  |
| Co | -.219 | -.382 | 1.000 |  |  |  |  |  |  |  |  |
| Cr | .669* | -.188 | -.006 | 1.000 |  |  |  |  |  |  |  |
| Cu | .681* | -.006 | -.018 | .491 | 1.000 |  |  |  |  |  |  |
| Fe | -.432 | -.721* | .394 | -.164 | -.139 | 1.000 |  |  |  |  |  |
| Mn | .584 | -.345 | -.079 | .733* | .067 | -.055 | 1.000 |  |  |  |  |
| Ni | .043 | -.276 | .632* | .227 | -.031 | -.129 | .301 | 1.000 |  |  |  |
| Pb | .608 | .006 | -.600 | .503 | .685* | -.103 | .358 | -.423 | 1.000 |  |  |
| Se | .249 | .442 | -.285 | .345 | -.079 | -.794** | .164 | .202 | -.030 | 1.000 |  |
| Zn | .426 | .539 | -.067 | .297 | .442 | -.455 | -.152 | -.018 | .103 | .394 | 1.000 |
| *. Correlation is significant at the 0.05 level (2-tailed). | | | | | | | | | | | |
| **. Correlation is significant at the 0.01 level (2-tailed). | | | | | | | | | | | |

**Supplementary table 3:** A comparison of heavy elements concentration (mg/kg) of crab samples in the present study with other studies.

| Location | As | Cd | Co | Cr | Cu | Fe | Mn | Ni | Pb | Se | Zn | References |
| --- | --- | --- | --- | --- | --- | --- | --- | --- | --- | --- | --- | --- |
| Andharmanik | 5.69 | 1.99 | 1.24 | 6.63 | 156.35 | 229.50 | 145.08 | 3.56 | 1.59 | 3.92 | 149.46 | Present study |
| Tanzanian coast | 1.0-6.0 | 0.002-0.013 | 0.01-0.03 | 0.02-0.10 | 8.6-19.5 | 12.0-43.2 | 1.0-15.9 | 0.01-0.14 | 0.01-0.07 | ˗ | 58.5-88.4 | Rumisha et al., 2017 |
| Chattogram coast | ˗ | 0.06 | ˗ | ˗ | ˗ | ˗ | ˗ | ˗ | 0.45 | ˗ | ˗ | Hossen et. al., 2024 |
| Khulna | 0.108 | 0.058 | ˗ | 0.098 | 0.031 | 0.058 | ˗ | 0.073 | 0.079 | ˗ | 0.548 | Ahmed et. al., 2023 |
| Bagerhat | 0.128 | 0.057 | ˗ | 0.077 | 0.056 | 0.074 | ˗ | 0.099 | 0.081 | ˗ | 0.474 |
| Satkhira | 0.107 | 0.056 | ˗ | 0.092 | 0.013 | 0.083 | ˗ | 0.051 | 0.086 | ˗ | 0.805 |
| Netravathi-Gurupur estuary | ˗ | 0.230 | 0.012 | 1.632 | 1.198 | 14.012 | 1.220 | 0.230 | 2.126 | ˗ | 3.839 | Saha et. al., 2025 |
| Ashtamudi Lake | ˗ | 0.976 | 16.533 | 47.430 | ˗ | ˗ | ˗ | ˗ | 22.583 | ˗ | 92.853 | Williams et. al., 2022 |
| East Java Estuaries | ˗ | 0.185- 0.321 | ˗ | 0.308-0.378 | 5.142-6.045 | ˗ | ˗ | ˗ | 0.260- 0.395 | ˗ | 7.203-7.934 | Soegianto et. al., 2022 |
| Ganges-Brahmaputra delta | 0.05 | 1.47 | ˗ | 0.18 | 90.15 | 867.10 | 98.08 | 0.98 | 2.71 | ˗ | 30.79 | Ferdousi et. al., 2025 |

**Supplementary table 4:** Sources of different heavy metals and their potential health effects

| **Heavy metals** | **Sources of heavy metals** | | **Health effects** | **References** |
| --- | --- | --- | --- | --- |
| **Natural sources** | **Anthropogenic sources** |
| As | - Weathering and leaching - Volcanic eruption - Erosion activities - Seismic activities - Forest fire - Biogenic activities - Biological processes - Terrestrial processes | Industrial dust and waste, pesticides, fertilizers, wood preservatives, biosolids, smelting, mining, medicinal, textile, pharmaceutical, wastewater, paints, production of steel and iron, combustion of fossil fuels | Luekamia, cancer (skin, bladder, liver, kidney), nervous system problems cardiovascular disease | (Rajjak, 2009; Jaishankar et al., 2014; H. Ali et al., 2019; Jyothi, 2020; Angon et al., 2024) |
| Cd | PVC products, paints, pigments, phosphate fertilizer, pesticides, electroplated parts, batteries, plastics, synthetic rubber, industrial dust, mining and metallurgy, wastewater photographic and engraving process, photoconductors, and photovoltaic cells | Gastric cancer, breast cancer, lung cancer, renal dysfunction, cadmium pneumonitis, bone disease, kidney disease |
| Co | Textile industry, plating, pigments, mining and metallurgy, pesticides, explosives, electrical and electronics waste | Hematological, hepatic, cardiovascular and endocrine |
| Cr | Textile industry, tanning, fly ash, paints and pigments, photography, tanning, steel industry, leather industry, industrial dust and fumes, fertilizers, mining and metallurgy | Dermatitis, male reproductive system damage, lung disorders (bronchitis and cancer) |
| Cu | Fertilizers, tanning, plating, printing and photovoltaic cells | Anemia, abdominal disorders, metabolic activity abnormalities |
| Fe | High intake of iron supplements and oral consumption | Vomiting, diarrhea, lethargy, abdominal pain and dehydration |
| Mn | Mining, industrial discharges, fossil fuel combustion | Manganese psychosis, manganism |
| Ni | Industrial dust, steel and iron industry, electroplating, food processing industries, fertilizers, industrial aerosols, mining and metallurgy, battery, kitchen appliances. | Increased risk of cancer (lung, nasal), kidney failure, and cardiovascular diseases |
| Pb | PVC pipes in sanitation, fertilizer, paints, jewelry, lead batteries, lunch boxes, insecticides, biosolids and agricultural manures | Intestine cancer, lung cancer, carcinoma, Alzheimer s disease, loss of memory, high blood pressure, short attention span |
| Se | Industrial waste water, fly ash, coal-fired power plants, surface mining, irrigated agriculture, sewage effluent, agricultural runoff | Liver damage, hair or nail loss, numbness on fingers or toes, body pain, muscle damage |
| Zn | Soldering, cosmetics, and pigments, fertilizers, oil refining, plumbing, brass manufacturing, electroplating, plating iron and steel, galvanization, mining and metallurgy. | Anemia, kidney and liver failure, prostate cancer, gastrointestinal disorders |
